# Supplementary material
Source: ML conference proceedings conference paper supplement (https://proceedings.neurips.cc/paper_files/paper/2019/hash/1a04f965818a8533f5613003c7db243d-Abstract.html)
Supplement: Supplementary file [file 1a04f965818a8533f5613003c7db243d-Supplemental.zip]

---

# Supplementary material: Direct Optimization through $\arg \max$ for Discrete Variational Auto-Encoder

---

**Guy Lorberbom**  
Technion

**Andreea Gane**  
MIT

**Tommi Jaakkola**  
MIT

**Tamir Hazan**  
Technion

**Theorem 1.** Assume  $h_\phi(x, z)$  is a smooth function of  $\phi$ . Let  $z^* \triangleq \arg \max_{\hat{z}} \{h_\phi(x, \hat{z}) + \gamma(\hat{z})\}$  and  $z^*(\epsilon) \triangleq \arg \max_{\hat{z}} \{\epsilon f_\theta(x, \hat{z}) + h_\phi(x, \hat{z}) + \gamma(\hat{z})\}$  be two random variables. Then

$$\nabla_\phi E_\gamma[f_\theta(x, z^*)] = \lim_{\epsilon \rightarrow 0} \frac{1}{\epsilon} \left( E_\gamma[\nabla_\phi h_\phi(x, z^*(\epsilon)) - \nabla_\phi h_\phi(x, z^*)] \right) \quad (1)$$

*Proof.* We use a “prediction generating function”  $G(\phi, \epsilon) = E_\gamma[\max_{\hat{z}} \{\epsilon f_\theta(x, \hat{z}) + h_\phi(x, \hat{z}) + \gamma(\hat{z})\}]$ , whose derivatives are functions of the predictions  $z^*, z^*(\epsilon)$ . The proof is composed from three steps:

1. We prove that  $G(\phi, \epsilon)$  is a smooth function of  $\phi, \epsilon$ . Therefore, the Hessian of  $G(\phi, \epsilon)$  exists and it is symmetric, namely

$$\partial_\phi \partial_\epsilon G(\phi, \epsilon) = \partial_\epsilon \partial_\phi G(\phi, \epsilon). \quad (2)$$

2. We show that encoder gradient is apparent in the Hessian:

$$\partial_\phi \partial_\epsilon G(\phi, 0) = \nabla_\phi E_\gamma[\theta(x, z^*)]. \quad (3)$$

3. We derive our update rule as the complement representation of the Hessian:

$$\partial_\epsilon \partial_\phi G(\phi, 0) = \lim_{\epsilon \rightarrow 0} \frac{1}{\epsilon} \left( E_\gamma[\nabla_\phi h_\phi(x, z^*(\epsilon)) - \nabla_\phi h_\phi(x, z^*)] \right) \quad (4)$$

First, we prove that  $G(\phi, \epsilon)$  is a smooth function. Recall,  $g(\gamma) = \prod_{z=1}^k e^{-(\gamma(z)+c)+e^{-(\gamma(z)+c)}}$  is the zero mean Gumbel probability density function. Applying a change of variable  $\hat{\gamma}(z) = \epsilon f_\theta(x, \hat{z}) + h_\phi(x, \hat{z}) + \gamma(\hat{z})$ , we obtain

$$G(\phi, \epsilon) = \int_{\mathbb{R}^k} g(\gamma) \max_{\hat{z}} \{\epsilon f_\theta(x, \hat{z}) + h_\phi(x, \hat{z}) + \gamma(\hat{z})\} d\gamma = \int_{\mathbb{R}^k} g(\hat{\gamma} - \epsilon f_\theta - h_\phi) \max_{\hat{z}} \{\hat{\gamma}(\hat{z})\} d\hat{\gamma}.$$

Since  $g(\hat{\gamma} - \epsilon f_\theta - h_\phi)$  is a smooth function of  $\epsilon$  and  $h_\phi(x, z)$  and  $f_\theta(x, z)$  is a smooth function of  $\phi$ , we conclude that  $G(\phi, \epsilon)$  is a smooth function of  $\phi, \epsilon$ . Therefore, the Hessian of  $G(\phi, \epsilon)$  exists and symmetric, i.e.,  $\partial_\phi \partial_\epsilon G(\phi, \epsilon) = \partial_\epsilon \partial_\phi G(\phi, \epsilon)$ . We thus proved Equation (2).

To prove Equations (3) and (4) we differentiate under the integral, both with respect to  $\epsilon$  and with respect to  $\phi$ . We are able to differentiate under the integral, since  $g(\hat{\gamma} - \epsilon f_\theta - h_\phi)$  is a smooth function of  $\epsilon$  and  $\phi$  and its gradient is bounded by an integrable function (cf. [2], Theorem 2.27, using the continuity of the max function).

We turn to prove Equation (3). We begin by noting that  $\max_{\hat{z}} \{\epsilon f_\theta(x, \hat{z}) + h_\phi(x, \hat{z}) + \gamma(\hat{z})\}$  is a maximum over linear function of  $\epsilon$ , thus by Danskin Theorem (cf. [1], Proposition 4.5.1) holds  $\partial_\epsilon (\max_{\hat{z}} \{\epsilon f_\theta(x, \hat{z}) + h_\phi(x, \hat{z}) + \gamma(\hat{z})\}) = f_\theta(x, z^*(\epsilon))$ . By differentiating under the integral,  $\partial_\epsilon G(\phi, \epsilon) = \mathbb{E}_\gamma[f_\theta(x, z^*(\epsilon))]$ . We obtain Equation (3) by differentiating under the integral, now with respect to  $\phi$ , and setting  $\epsilon = 0$ .

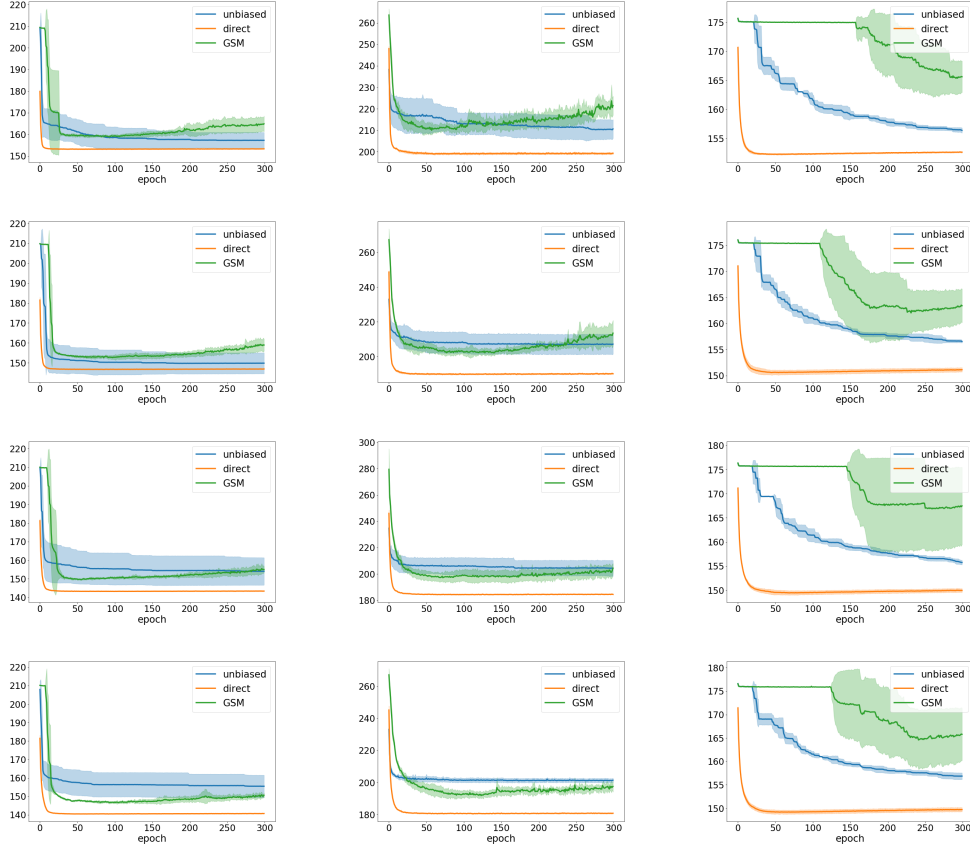

Figure 1: Test loss for  $k = 20, 30, 40, 50$  (left: MNIST, middle: Fashion-MNIST, right: Omniglot)

Finally, we turn to prove Equation (4). By differentiating under the integral  $\partial_\phi G(\phi, \epsilon) = \mathbb{E}_\gamma[\nabla_\phi h_\phi(x, z^*(\epsilon))]$ . Equation (4) is attained by taking the derivative with respect to  $\epsilon = 0$  on both sides.

The theorem follows by combining Equation (2) when  $\epsilon = 0$ , i.e.,  $\partial_\phi \partial_\epsilon G(\phi, 0) = \partial_\epsilon \partial_\phi G(\phi, 0)$  with the equalities in Equations (3) and (4).  $\square$

## 1 Gumbel-Max perturbation model and the Gibbs distribution

**Theorem 2.** [3, 4, 5] Let  $\gamma$  be a random function that associates random variable  $\gamma(z)$  for each  $z = 1, \dots, k$  whose distribution follows the zero mean Gumbel distribution law, i.e., its probability density function is  $g(t) = e^{-(t+c+e^{-(t+c)})}$  for the Euler constant  $c \approx 0.57$ . Then

$$\frac{e^{h_\phi(x, z)}}{\sum_{\hat{z}} e^{h_\phi(x, \hat{z})}} = \mathbb{P}_{\gamma \sim g}[z = z^*],$$

$$\text{where } z^* \triangleq \arg \max_{\hat{z}=1, \dots, k} \{h_\phi(x, \hat{z}) + \gamma(\hat{z})\} \quad (5)$$

*Proof.* Let  $G(t) = e^{-e^{-(t+c)}}$  be the Gumbel cumulative distribution function. Then

$$\begin{aligned} \mathbb{P}_{\gamma \sim g}[z = z^*] &= \mathbb{P}_{\gamma \sim g}[z = \arg \max_{\hat{z}=1, \dots, k} \{h_\phi(x, \hat{z}) + \gamma(\hat{z})\}] \\ &= \int g(t - \phi(x, z)) \prod_{\hat{z} \neq z} G(t - h_\phi(x, \hat{z})) dt \end{aligned}$$

Since  $g(t) = e^{-(t+c)}G(t)$  it holds that

$$\int g(t - h_\phi(z)) \prod_{\hat{z} \neq z} G(t - h_\phi(\hat{z})) dt \quad (6)$$

$$\begin{aligned} &= \int e^{-(t - h_\phi(x, z) + c)} G(t - h_\phi(x, z)) \prod_{\hat{z} \neq z} G(t - h_\phi(x, \hat{z})) dt \\ &= \frac{e^{h_\phi(x, z)}}{Z} \end{aligned} \quad (7)$$

where  $\frac{1}{Z} = \int e^{-(t+c)} \prod_{\hat{z}=1}^k G(t - h_\phi(\hat{z})) dt$  is independent of  $z$ . Since  $\mathbb{P}_{\gamma \sim g}[z = z^*]$  is a distribution then  $Z$  must equal to  $\sum_{\hat{z}=1}^k e^{h_\phi(x, \hat{z})}$ .  $\square$

## References

- [1] D. P. Bertsekas, A. Nedić, and A. E. Ozdaglar. *Convex Analysis and Optimization*. Athena Scientific, 2003.
- [2] G.B. Folland. *Real analysis: Modern techniques and their applications*, John Wiley & sons. New York, 1999.
- [3] E.J. Gumbel and J. Lieblein. *Statistical theory of extreme values and some practical applications: a series of lectures*, volume 33. US Govt. Print. Office, 1954.
- [4] R.D. Luce. *Individual choice behavior*. 1959.
- [5] D. McFadden. *Conditional logit analysis of qualitative choice behavior*. 1973.
